# Supplementary material
Source: PubMed Central journal article supplement (PMC4360025)
Supplement: suppmaterial.pdf [file suppmaterial.pdf]

## Supplemental materials

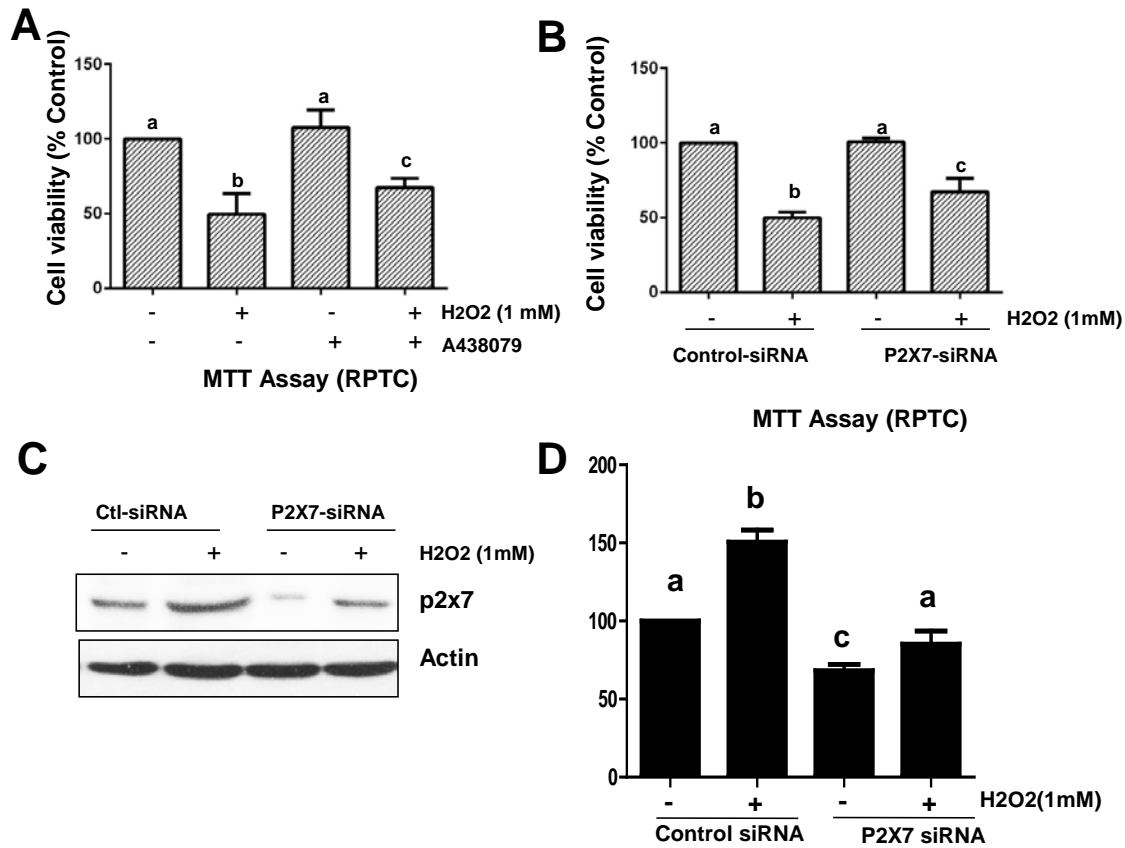

**Figure 1. A438079 inhibits H<sub>2</sub>O<sub>2</sub>-induced death of renal proximal tubular cells (RPTC).**(A)

Confluent RPTC were treated with 10  $\mu$ M A438079 for 1 h and then exposed to 1mM H<sub>2</sub>O<sub>2</sub> for 5 h. Cell viability was assessed by 3-(4,5-dimethylthiazol-2-yl)-2,5-diphenyltetrazolium bromide (MTT) assay).

(B) RPTC were transfected with scrambled small interference (si)RNA or p2X7R-specific small interference (si)RNA. At 12 h after transfection, cells were starved for an additional 24 h and then treated with 1 mM H<sub>2</sub>O<sub>2</sub> for 5 h. Cell viability were assessed by the MTT assay. (C) At 5 h after treatment with 1 mM H<sub>2</sub>O<sub>2</sub>, cells were harvested and the whole cell lyates were used for immunoblot analysis with specific antibodies against p2x7R or actin. Representative immunoblot from three experiments are shown. (D) Expression levels of p2x7 were quantified by densitometry and normalized

with actin. Data are represented as the mean  $\pm$  S.E.M. Means with different superscript letters are significantly different from one another ( $P < 0.05$ ).
